# Supplementary material
Source: PubMed Central journal article supplement (PMC3463189)
Supplement: bi101192f_si_001.pdf [file bi101192f_si_001.pdf]

## Online Supporting Information

### Insights into Base Selectivity from the 1.8 Å Resolution Structure of an RB69 DNA Polymerase Ternary Complex

Mina Wang, Shuangluo, Xia, Gregor Blaha, Thomas A. Steitz, William H. Konigsberg, and Jimin Wang

#### Online Supplementary Figure Captions

**Figure S1.** Experimental Evidence for five buried water molecules mediating the polymerase-DNA duplex interactions. (A) Stereodiagram of final 2Fo-Fc maps contoured at 0.75  $\sigma$  superimposed on the refined model showing five buried water molecules. (B) Stereodiagram of the 2Fo-Fc maps contoured 0.7  $\sigma$  superimposed on the refined model (edited to remove non-solvent density for clarity). (C) Stereodiagram of the superposition of this complex (golden, red) onto the  $\phi$ 29 pol ternary complex (cyan, and green, Berman *et al.*, 2007, EMBO J. 26, 3496-3505).

**Figure S2.** Solvation of the nascent base pair. (A-B) Two orthogonal views of the final 2Fo-Fc maps contoured at 1.2  $\sigma$  superimposed on the refined RB69 pol (cyan) and the nascent base-pair (golden). (C) Stereodiagram of solvent structure around the edge of the nascent base pair.

**Figure S3.** Distribution of the geometry of ribonucleotide residues in the 50S ribosome structure (1VQ0, Schmeing *et al.*, 2005, Mol. Cell 20, 437-448). (A) Distribution of the O5'-C6 (U or C) or O5'-C8 (A or G) distances versus the projected angles between the glycosidic bond and the C5'-O5' bond. (B) Distribution of the O5'-C6 or O5'-C8 distances versus the unsigned pseudo dihedral torsion angles of from O5'-C5' to the glycosidic bond C1'-N1 (U or C) or to C1'-N9 (A or G) atoms. Source codes for this analysis are available upon request (to. J.W.).

**Figure S4.** Rigidity of the templating nucleotide binding pocket. (A) Interactions of 5' and 3'-phosphodiester of the dG with RB69 pol. (B). Space-filling model of the binding pockets for 5' and 3'-phosphodiester of the dG.

**Figure S5.** Hydration structure of DNA duplex within the ternary complex. (A). Superposition of the observed DNA duplex (primer stand in yellow and template strand in gold) on an idealized B form (cyan and green). (B). Same as (A) but observed DNA is superimposed on an idealized A form (cyan

and green). (C). A stereodiagram of superposition of the final 2Fo-Fc maps for hydration shells (cyan, the first shell, magenta, the second shell, and blue, the third shell) onto the DNA duplex. Two spines of hydration are in circle. (D). A rear-view of (C) with five buried water molecules encircled.

Online Supplementary Figures

**A**

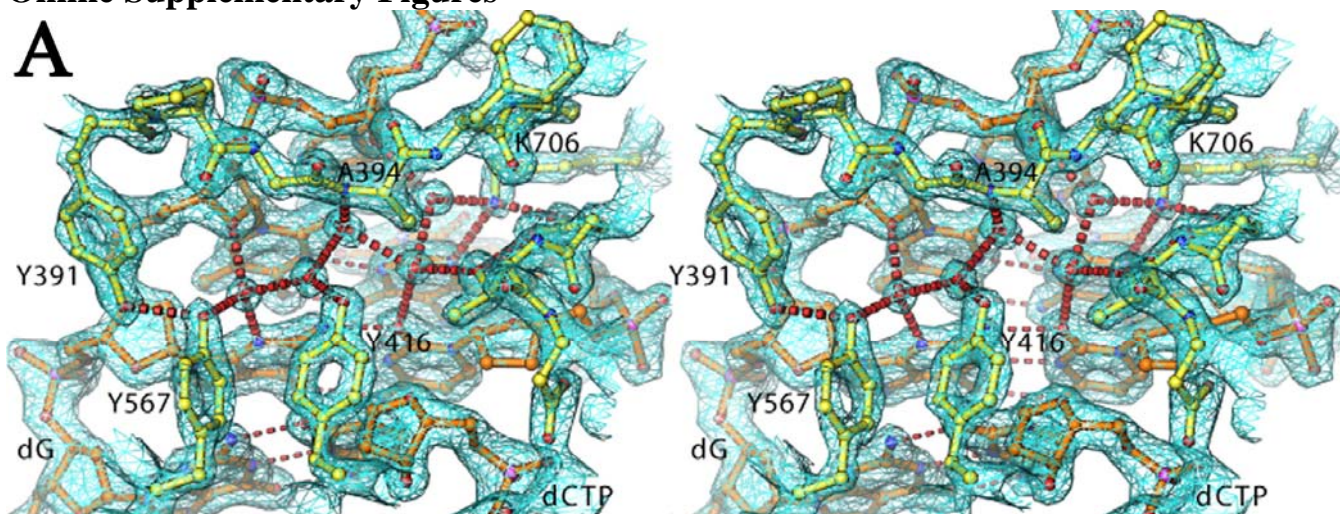

**B**

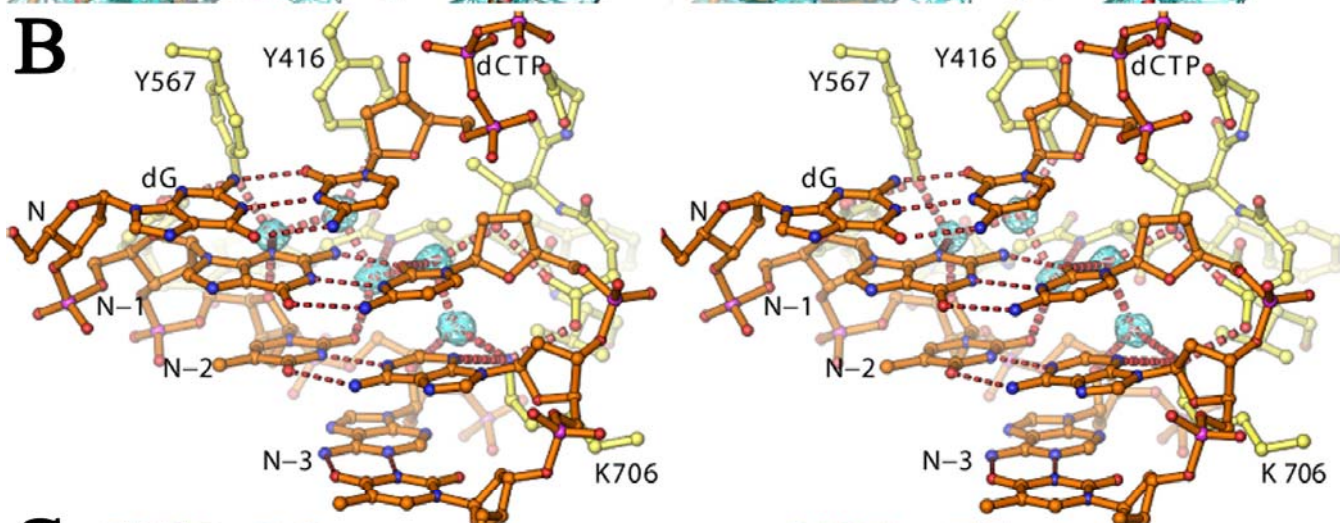

**C**

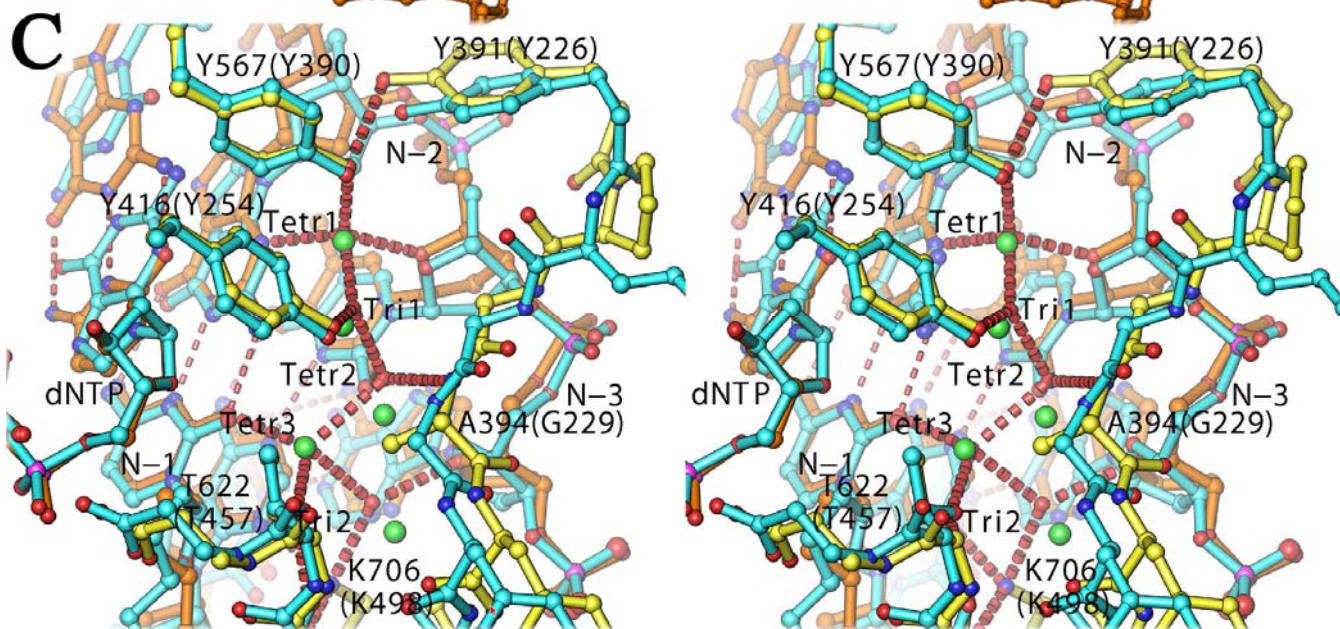

Figure S1.

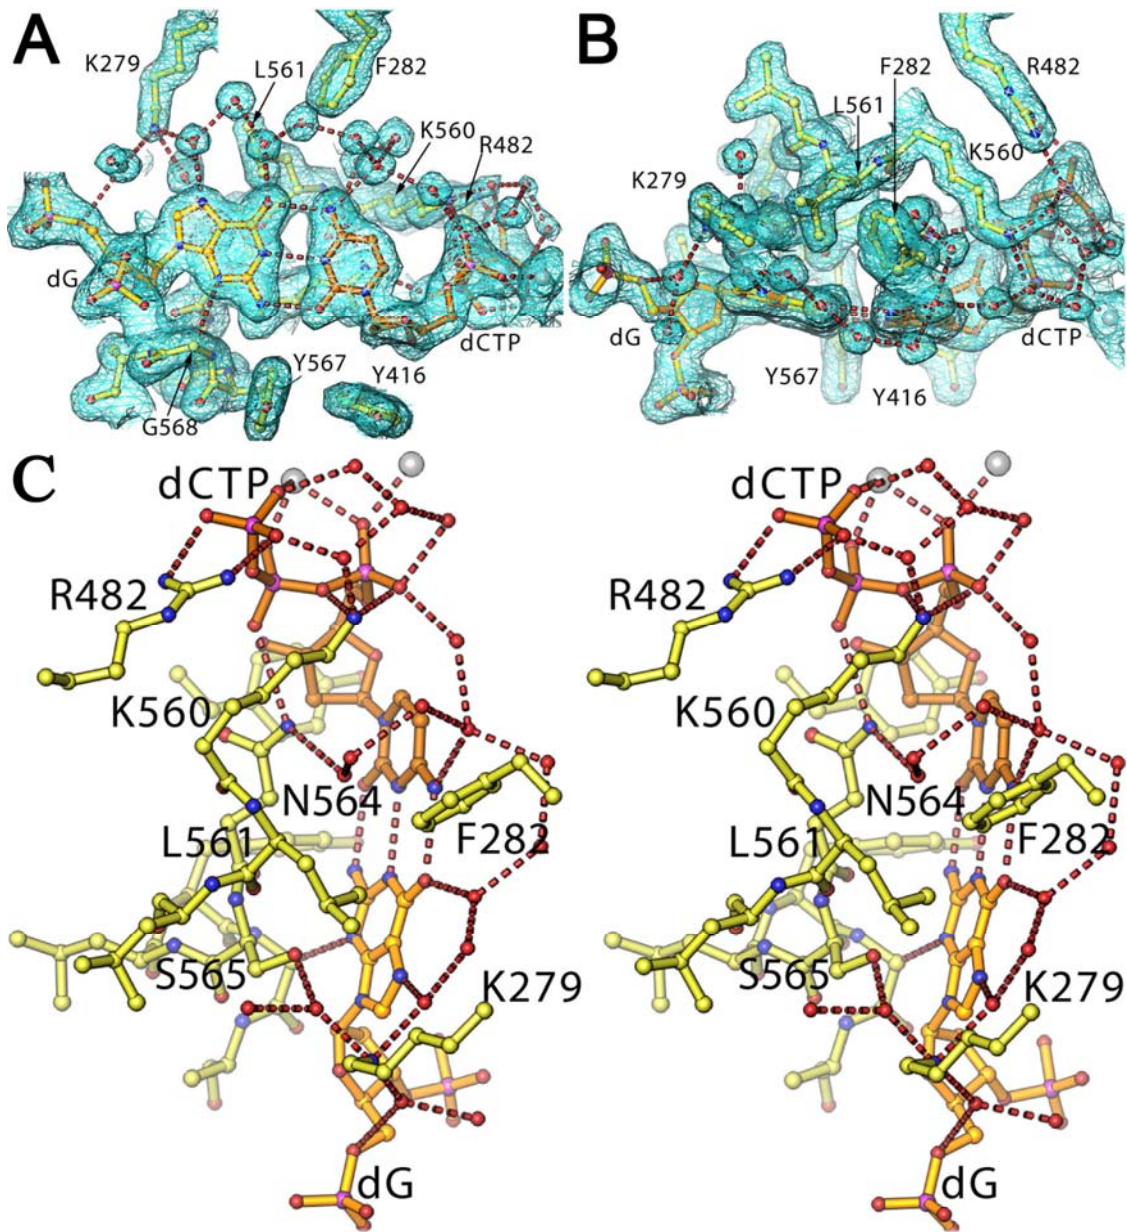

**Figure S2.**

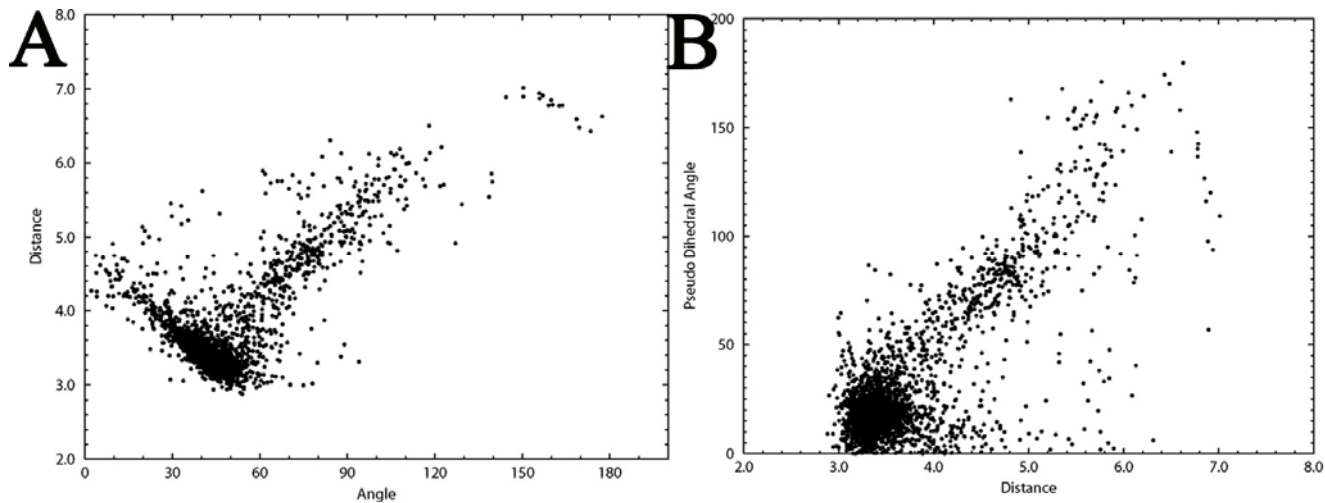

**Figure S3.**

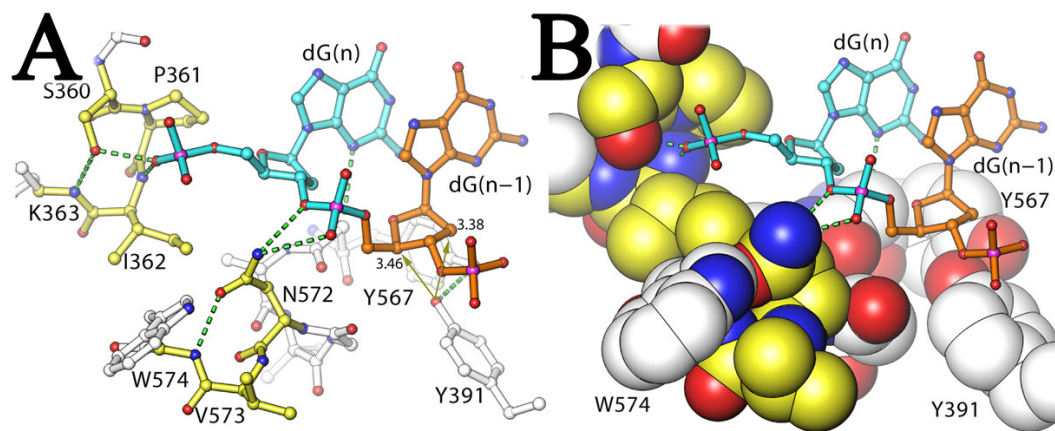

**Figure S4.**

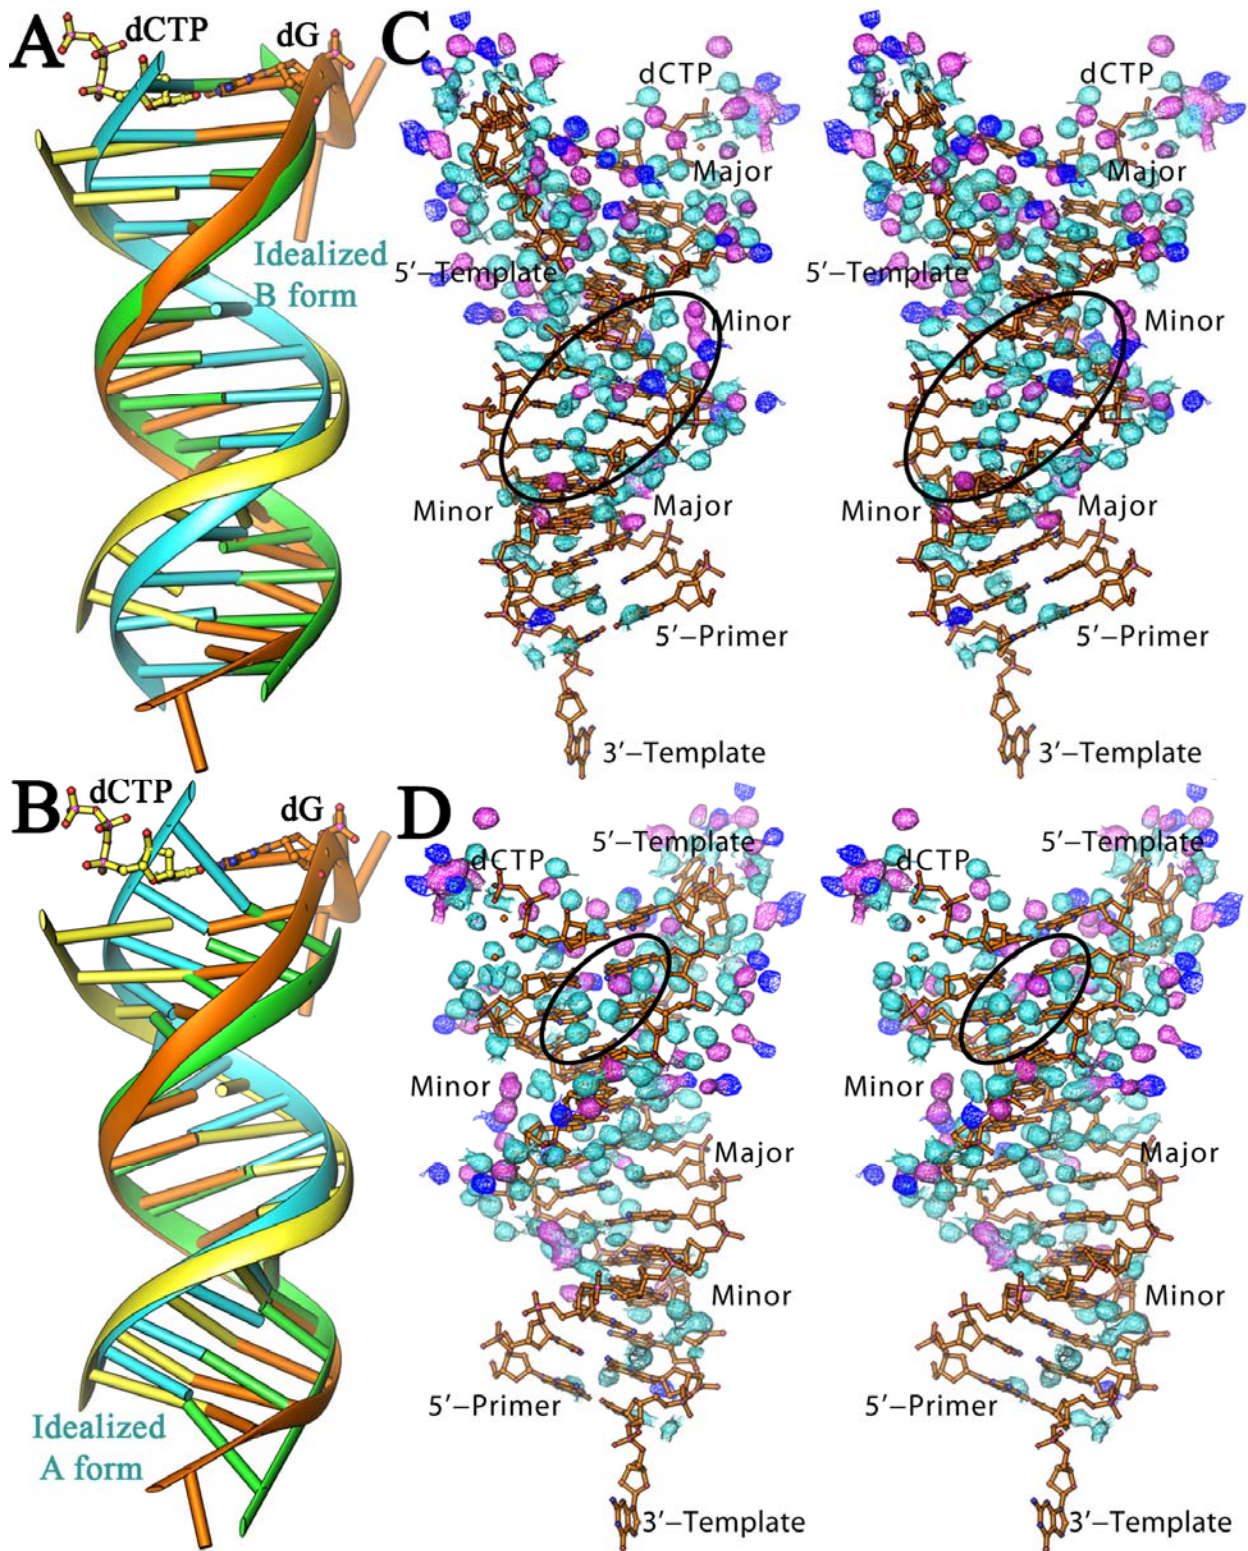

Figure S5.
